# Supplementary material
Source: PubMed Central journal article supplement (PMC3372866)
Supplement: NIHMS373769-supplement-01.pdf [file NIHMS373769-supplement-01.pdf]

## Estradiol acutely suppresses inhibition in the hippocampus through a sex-specific endocannabinoid and mGluR dependent mechanism

Guang Zhe Huang and Catherine S. Woolley

### SUPPLEMENTAL EXPERIMENTAL PROCEDURES

#### *Animals and tissue preparation*

All animal procedures were performed in accordance with the National Institutes of Health *Guide to the Care and Use of Laboratory Animals* and were approved by the Northwestern University Animal Care and Use Committee. Most experiments were done with female Sprague Dawley rats, 47-57 days old. One set of experiments was done with male Sprague Dawley rats, also 47-57 days old. All rats were housed on a 12 hr light/dark cycle with *ad libitum* access to water and phytoestrogen-free food. Females were bilaterally ovariectomized under ketamine (85 mg/kg)/xylazine (13 mg/kg) anesthesia and used for recording 3-6 days after surgery. Males were gonadally intact or anesthetized as above, castrated and used for recording 3-6 days following surgery. On the day of recording, each rat was deeply anesthetized with Euthasol (100–125 mg/kg) and transcardially perfused with ice-cold oxygenated (95% O<sub>2</sub>/5% CO<sub>2</sub>) sucrose artificial cerebrospinal fluid (sACSF) containing (in mM): 75 sucrose, 75 NaCl, 2 KCl, 25 NaHCO<sub>3</sub>, 1.25 NaH<sub>2</sub>PO<sub>4</sub>, 2.4 Na pyruvate, 1.3 ascorbic acid, 3 MgCl<sub>2</sub>, 0.5 CaCl<sub>2</sub>, 15 dextrose, pH 7.4. The brain was quickly removed, cooled in ice-cold oxygenated sACSF, and then hippocampal slices (300 μm) were cut with a vibratome (VT1000S; Leica). Slices were incubated for 30-45 min at 34-35°C in oxygenated regular ACSF containing (in mM): 126 NaCl, 3 KCl, 26 NaHCO<sub>3</sub>, 1.25 NaH<sub>2</sub>PO<sub>4</sub>, 1 MgCl<sub>2</sub>, 2 CaCl<sub>2</sub>, 10 dextrose, pH 7.5, and then maintained in regular ACSF at room temperature (20-22°C) until recording.

### *Electrophysiological recording*

Each slice was transferred to a submersion chamber mounted on a Zeiss Axio Examiner microscope equipped with a water-immersion 40×/1.0 DIC objective and was continuously perfused at 1.5-2.0 ml/min with oxygenated regular ACSF (34-35°C). CA1 pyramidal cells were visualized a Sencicam QE CCD camera. Whole-cell patch-clamp recordings were obtained using a MultiClamp 700B amplifier and Clampex 10.2 software. The signal was low-pass filtered at 2 kHz and sampled at 5 kHz with a DigiData 1440A interface. Recording electrodes had tip resistances ranging from 4–6 MΩ when filled with internal solution, which contained (in mM): 110 K-gluconate, 25 KCl, 10 HEPES, 0.2 EGTA, 2 MgATP, 0.3 NaGTP, 10 Na<sup>2</sup>- creatinine phosphate, 0.1% biocytin, pH 7.2-7.3. E<sub>Cl<sup>-</sup></sub> was -43 mV. Of note, E2 modulation of IPSCs was never observed when recording with a CsCl-based internal solution, possibly owing to interference with postsynaptic G protein-coupled signaling. Series resistance (12–25 MΩ) was compensated (70%) and monitored every minute with 10 ms, 3 mV steps from a holding potential of -70 mV. Cells were excluded from analysis if more than a 20% change in series resistance occurred during a recording. Data were not corrected for junction potential (14 mV). GABA<sub>A</sub> receptor-mediated IPSCs were evoked via a glass bipolar stimulating electrode (tip: 10–20 μm) placed in the CA1 pyramidal cell layer 30–150 μm from the recording electrode, and were recorded in the presence of 6,7-dinitroquinoxaline-2,3-dione (DNQX; 10 μM), DL-2-amino-5-phosphonopentanoic acid (DL-AP5; 50 μM), and CGP55845 (1 μM). Evoked IPSCs were blocked by the GABA<sub>A</sub> receptor antagonist SR 95531 (2 μM) applied at the end of each experiment.

For evoked IPSCs, paired stimulations (0.1 msec duration) were delivered at 0.067 Hz with a 100 msec inter-stimulus interval using a WPI stimulus isolation unit. We recorded IPSCs elicited by activation of multiple or single interneuron axons, as assessed by a stimulus-response curve for each cell. Putative unitary IPSCs were identified by: 1) 10% decrements or increments of stimulus intensity did not change

mean IPSC amplitude, 2) response latency and/or shape did not change over the course of the experiment, and 3) decreasing stimulus intensity by >15% led to an abrupt and total failure of responses. For compound IPSCs, stimulus intensity was adjusted to evoke an IPSC of approximately 50% of the maximum amplitude. For unitary IPSCs, stimulus intensity was set at 110–120% of the threshold intensity. Stimulus intensity was then kept constant throughout a recording. Drug and/or E2 effects were assessed by averaging IPSCs recorded during the last 2 min before drug application to those recorded during the last 2 min in each condition. Failures were included in analysis of pharmacological effects. E2-responsive experiments were identified using a threshold of 25% change in IPSC amplitude (see Results). For DSI, cells were depolarized to 0 mV for 2 sec.

All chemicals were purchased from Sigma, except for CGP55845, SR 95531, PPT, DPN, AM251, JNJ 16259685, MPEP, CPCCOEt (Tocris Bioscience), JZL 184 (Cayman Chemical Co.), and GDP $\beta$ S (EMD Chemicals, Tocris). Stock solutions were prepared in DMSO or ddH<sub>2</sub>O, and were diluted in aCSF on the day of recording to the final concentrations indicated. Control aCSF contained an equivalent concentration of DMSO (<0.1%).

Data are reported as mean  $\pm$  SEM. Statistical comparisons were made using paired Student's *t*-tests and  $p < 0.05$  was taken as indicating a statistically significant effect ( $*p < 0.05$  and  $**p < 0.01$ ).
